# Supplementary material for: Monodispersed Ag nanoparticles loaded on the PVP-assisted synthetic Bi2O2CO3 microspheres with enhanced photocatalytic and supercapacitive performances
Source: Royal Society of Chemistry journal article supplement (doi:10.1039/c3ta10951h), 2013-01-01
Supplement: c3ta10951h.pdf [file c3ta10951h.pdf]

# Supporting Information

## Monodispersed Ag nanoparticles loaded on the PVP-assisted synthetic $\text{Bi}_2\text{O}_2\text{CO}_3$ microspheres with enhanced photocatalytic and supercapacitive performances

Shengjie Peng,<sup>\*a</sup> Linlin Li,<sup>a,b</sup> Huiteng Tan,<sup>a</sup> Yongzhi Wu,<sup>c,d</sup> Ren Cai,<sup>a</sup> Hong Yu,<sup>a,b</sup> Xin Huang,<sup>a</sup> Peining Zhu,<sup>d</sup> Seeram Ramakrishna,<sup>d</sup> Madhavi Srinivasan,<sup>a,b</sup> and Qingyu Yan<sup>\*a,b</sup>

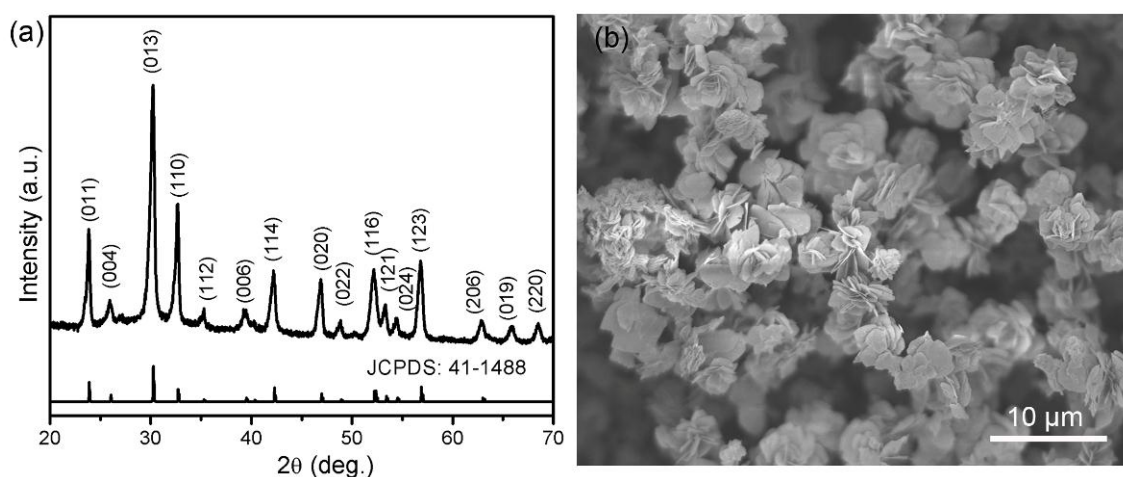

**Fig. S1** XRD pattern and SEM image of the  $\text{Bi}_2\text{O}_2\text{CO}_3$ -3 by using  $\text{Na}_2\text{CO}_3$  as the precursor.

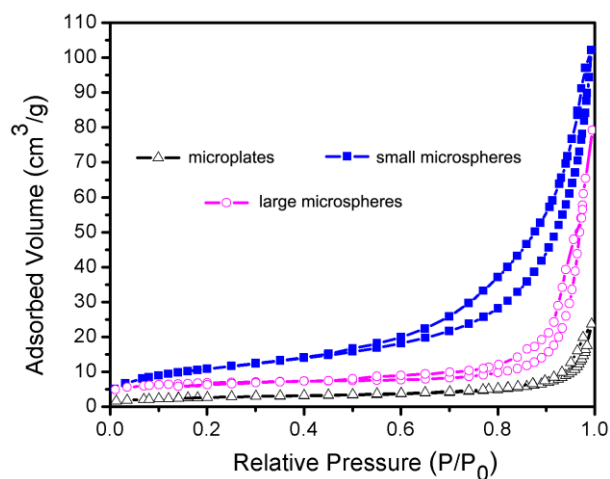

**Fig. S2** Nitrogen adsorption–desorption isotherm and the corresponding pore size distribution (inset) of Bi<sub>2</sub>O<sub>2</sub>CO<sub>3</sub>-1, Bi<sub>2</sub>O<sub>2</sub>CO<sub>3</sub>-2 and Bi<sub>2</sub>O<sub>2</sub>CO<sub>3</sub>-3, respectively.

The Brunauer–Emmett–Teller (BET) surface areas of Bi<sub>2</sub>O<sub>2</sub>CO<sub>3</sub>-1, Bi<sub>2</sub>O<sub>2</sub>CO<sub>3</sub>-2 and Bi<sub>2</sub>O<sub>2</sub>CO<sub>3</sub>-3 calculated from N<sub>2</sub> isotherms are 45.8, 29.3 and 8.9 m<sup>2</sup> g<sup>-1</sup>, respectively.

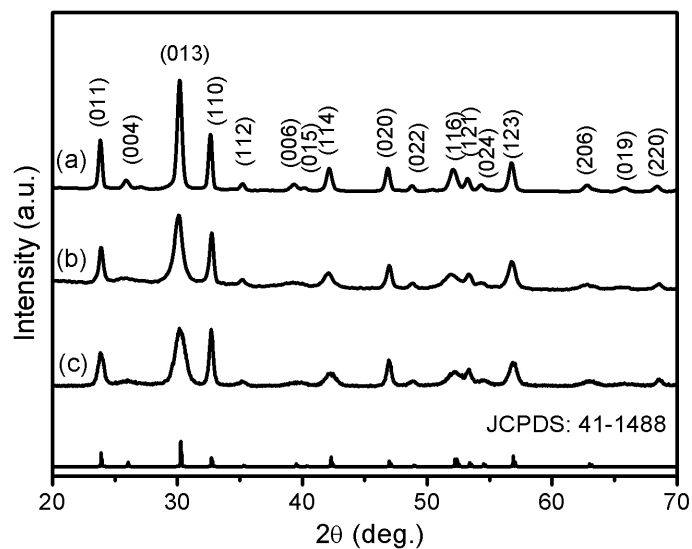

**Fig. S3** XRD patterns of samples using different amounts of PVP: 0.2 g (a), 0.4 g (b), and 0.6 g (c), respectively.

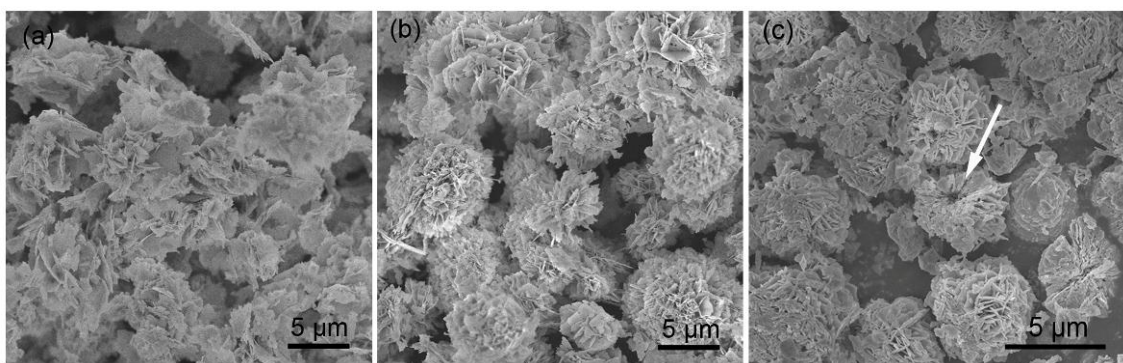

**Fig. S4** SEM images of samples using different amounts of PVP: 0.2 g (a), 0.4 g (b), and 0.6 g (c), respectively.

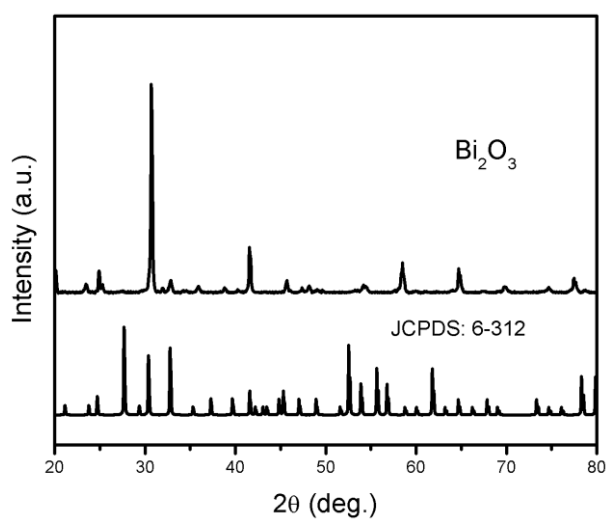

**Fig. S5** XRD pattern of the product obtained in the absence of PVP and only using 0.9 g of HMT.

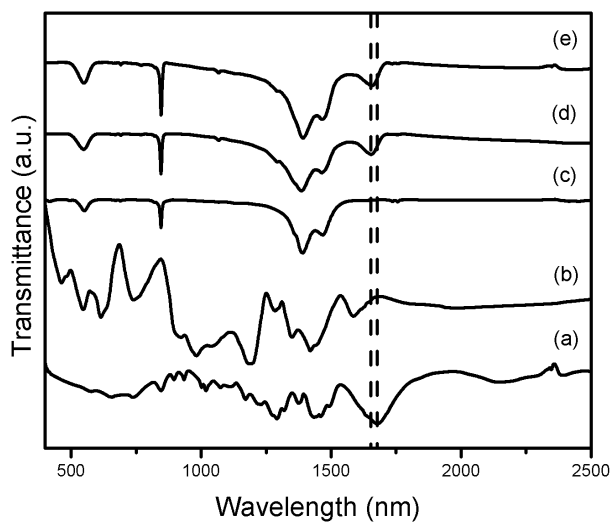

**Fig. S6** IR spectra of the PVP (a), PVP/Bi(NO<sub>3</sub>)<sub>3</sub> (b), Bi<sub>2</sub>O<sub>2</sub>CO<sub>3</sub>-3 (c), Bi<sub>2</sub>O<sub>2</sub>CO<sub>3</sub>-2 (d) Bi<sub>2</sub>O<sub>2</sub>CO<sub>3</sub>-1 (e), respectively.

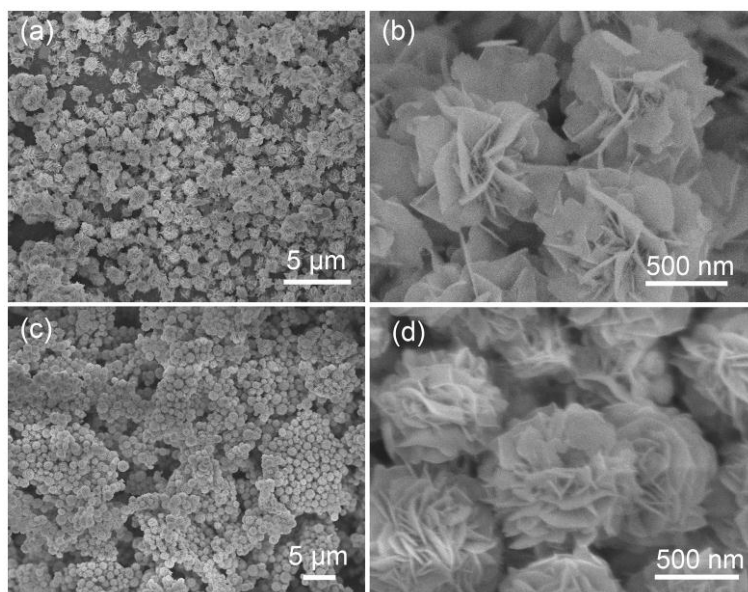

**Fig. S7** SEM images of  $\text{Bi}_2\text{O}_2\text{CO}_3\text{-1}$  obtained through different times: 30 min (a,b), and 4 h (c, d), respectively.

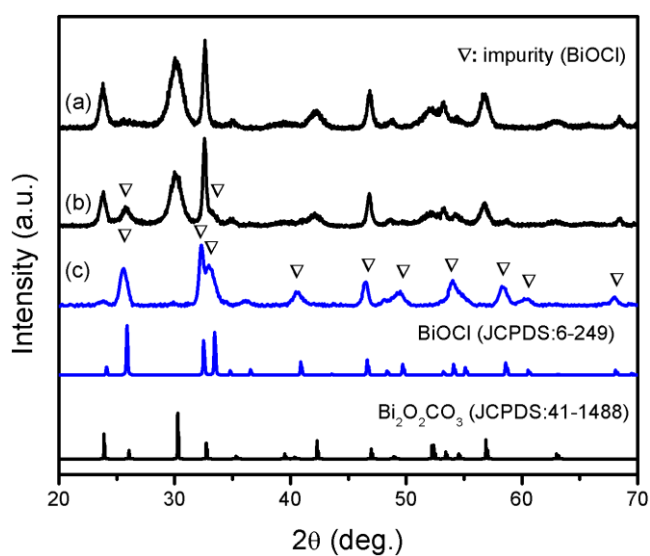

**Fig. S8** XRD patterns of the products obtained by using 0.04 g (a), 0.06 g (b) and 0.2 g (c) of KCl, respectively.

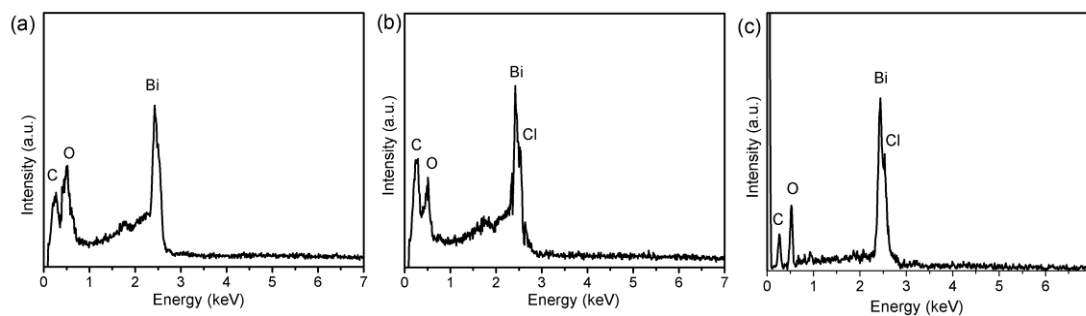

**Fig. S9** EDS spectra of the products obtained by using 0.04 g (a), 0.06 g (b) and 0.2 g (c) of KCl, respectively.

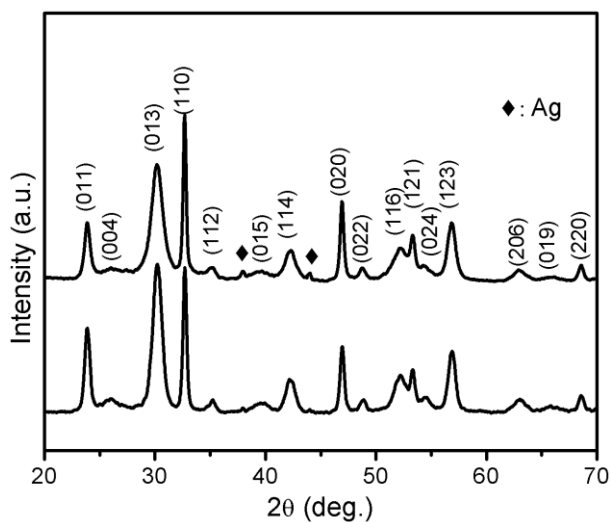

**Fig. S10** XRD pattern of Ag(0.3%)/Bi<sub>2</sub>O<sub>2</sub>CO<sub>3</sub>-1 and Ag(0.9%)/Bi<sub>2</sub>O<sub>2</sub>CO<sub>3</sub>-1, respectively.

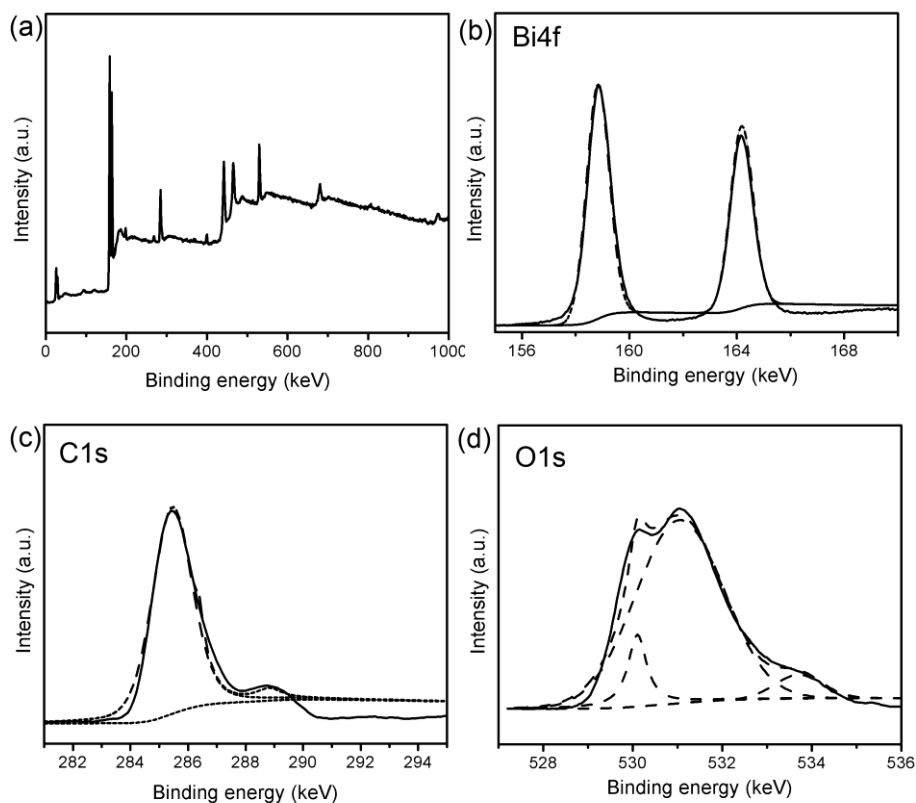

**Fig. S11** XPS spectrum of the obtained Ag(0.6%)/Bi<sub>2</sub>O<sub>2</sub>CO<sub>3</sub>-1: survey XPS spectrum (a), high-resolution Bi 4f (b), C 1s (c), and O 1s (d) spectrum.

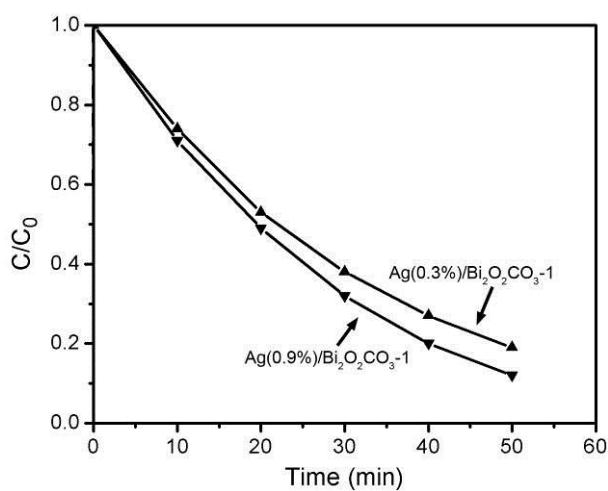

**Fig. S12** Time-dependent absorption spectra of MO photocatalytic degradation with Ag(0.3%)/Bi<sub>2</sub>O<sub>2</sub>CO<sub>3</sub>-1 and Ag(0.9%)/Bi<sub>2</sub>O<sub>2</sub>CO<sub>3</sub>-1, respectively.

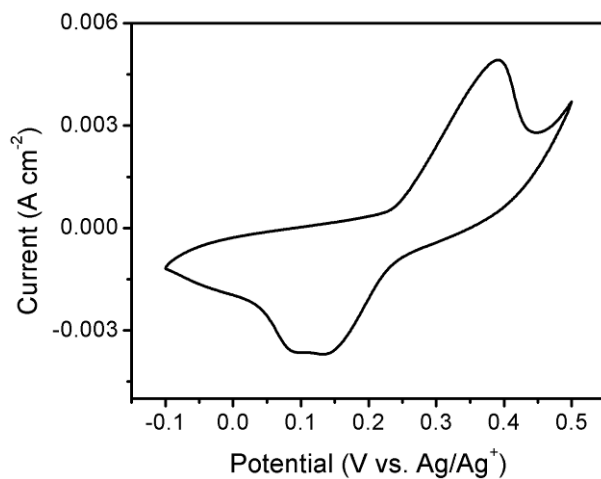

**Fig. S13** The CV curves of Ni foam without loading of  $\text{Bi}_2\text{O}_2\text{CO}_3$  at  $50 \text{ mV s}^{-1}$ .

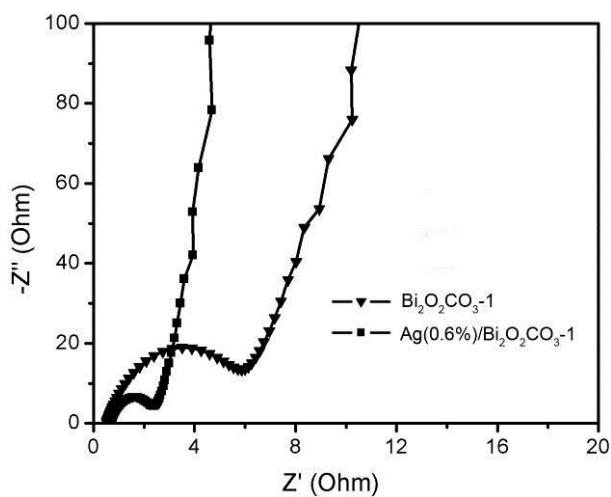

**Fig. S14** Nyquist plots of the EIS for the  $\text{Bi}_2\text{O}_2\text{CO}_3-1$ ,  $\text{Ag}(0.6\%)/\text{Bi}_2\text{O}_2\text{CO}_3-1$ .



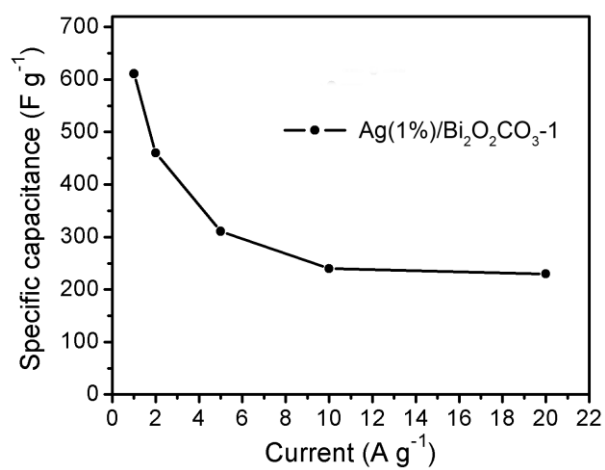

**Fig. S15** Specific capacitance as a function of current densities for Ag(1%)/Bi<sub>2</sub>O<sub>2</sub>CO<sub>3</sub>-1.
